# Supplementary material for: Plant Essential Oils as Biopesticides: Applications, Mechanisms, Innovations, and Constraints
Source: MDPI journal article supplement (doi:10.3390/plants12162916), 2023-08-10
Supplement: s1 [file s1]

## Supporting Information

**Table S1:** Main information table showing bibliometric analysis details (Scopus [40]; Web of Science [41])

| Description                     | Results        |           |
|---------------------------------|----------------|-----------|
| MAIN INFORMATION ABOUT DATA     |                |           |
|                                 | Web of Science | Scopus    |
| Timespan                        | 1999:2022      | 1999:2022 |
| Sources (Journals, Books, etc)  | 150            | 260       |
| Documents                       | 328            | 602       |
| Annual Growth Rate %            | 20.51          | 21.73     |
| Document Average Age            | 3.29           | 4.52      |
| Average citations per doc       | 20.91          | 24.53     |
| References                      | 18347          | 35955     |
| DOCUMENT CONTENTS               |                |           |
| Keywords Plus (ID)              | 1240           | 3638      |
| Author's Keywords (DE)          | 1071           | 1695      |
| AUTHORS                         |                |           |
| Authors                         | 1479           | 2454      |
| Authors of single-authored docs | 8              | 28        |
| AUTHORS COLLABORATION           |                |           |
| Single-authored docs            | 11             | 32        |
| Co-Authors per Doc              | 5.84           | 5.23      |
| International co-authorships %  | 35.67          | 27.41     |
| DOCUMENT TYPES                  |                |           |
| article                         | 260            | 477       |
| article; early access           | 2              | 0         |
| article; proceedings paper      | 4              | 15        |
| review                          | 60             | 77        |
| review; book chapter            | 1              | 30        |
| review; early access            | 1              | 0         |
| data papers                     | 0              | 3         |

**Table S2.** A list of leading (top 10) authors, sources (journals), countries, and affiliations/ universities/ institutions exploring the role of plant essential oils as biopesticides (Source: [41]).

| <b>Authors/Sources</b>                           | <b>No. of Articles</b> | <b>Countries/Institutions</b>                   | <b>No. of Articles</b> |
|--------------------------------------------------|------------------------|-------------------------------------------------|------------------------|
| <b>Top 10 authors</b>                            |                        | <b>Top 10 countries</b>                         |                        |
| Senthil-Nathan S                                 | 22                     | Brazil                                          | 137                    |
| Benelli G                                        | 19                     | Italy                                           | 126                    |
| Maggi F                                          | 13                     | India                                           | 94                     |
| Vasantha-Srinivasan P                            | 13                     | Spain                                           | 67                     |
| Pavela R                                         | 11                     | The United States of America (USA)              | 57                     |
| Thanigaivel A                                    | 11                     | Argentina                                       | 50                     |
| Ponsankar A                                      | 10                     | Egypt                                           | 46                     |
| Karthi S                                         | 9                      | China                                           | 37                     |
| Canale A                                         | 8                      | Iran                                            | 37                     |
| Campolo O                                        | 7                      | Saudi Arabia                                    | 37                     |
| <b>Top 10 journals/sources</b>                   |                        | <b>Top 10 affiliations/ institutions</b>        |                        |
| Industrial Crops and Products                    | 26                     | University of Camerino, Italy                   | 23                     |
| Plants-Basel                                     | 17                     | King Saud University, Saudi Arabia              | 22                     |
| Molecules                                        | 16                     | Manonmaniam Sundaranar University, India        | 21                     |
| International Journal of Tropical Insect Science | 9                      | The University of Pisa, Italy                   | 20                     |
| Agronomy-Basel                                   | 8                      | The Federal University of Viçosa (UFV), Brazil  | 17                     |
| Ecotoxicology And Environmental Safety           | 8                      | Kasetsart University, Thailand                  | 14                     |
| Environmental Science and Pollution Research     | 8                      | National University of Córdoba, Argentina       | 14                     |
| Crop Protection                                  | 7                      | Alexandria University, Egypt                    | 13                     |
| Frontiers in Plant Science                       | 7                      | The Federal University of Sergipe (UFS), Brazil | 13                     |
| Insects                                          | 7                      | The University of Liège, Belgium                | 12                     |
